# Supplementary material for: Synthesis of New 1, 3, 4-Oxadiazole-Incorporated 1, 2, 3-Triazole Moieties as Potential Anticancer Agents Targeting Thymidylate Synthase and Their Docking Studies
Source: PubMed Central journal article supplement (PMC7696185; doi:10.3390/ph13110390), 2020-11-14
Supplement: pharmaceuticals-13-00390-s001.pdf [file pharmaceuticals-13-00390-s001.pdf]

## **SUPPLEMENTARY MATERIAL**

### **Synthesis and molecular docking of new 1,3,4-oxadiazole incorporated 1,2,3-triazole moiety as a potential anticancer agent targeting thymidylate synthase.**

**Mohammad Mahboob Alam<sup>1</sup>, Abdurraheem SA. Almalki<sup>2</sup>, Thikryat Neamatallah<sup>3,†</sup>, Nada M. Ali<sup>1</sup>, Azizah M. Malebari<sup>4</sup>, Syed Nazreen<sup>1,†,\*</sup>**

<sup>1</sup> Department of Chemistry, Faculty of Science, Albaha University, Albaha, Kingdom of Saudi Arabia

<sup>2</sup> Department of Chemistry, Faculty of Science, Taif University, Taif, Kingdom of Saudi Arabia

<sup>3</sup> Department of Pharmacology and Toxicology, Faculty of Pharmacy, King Abdulaziz University, Jeddah, Kingdom of Saudi Arabia

<sup>4</sup> Department of Pharmaceutical Chemistry, Faculty of Pharmacy, King Abdulaziz University, Jeddah, Kingdom of Saudi Arabia

\* Correspondence: syed.nazreen22885@gmail.com

† These authors contributed equally to this work

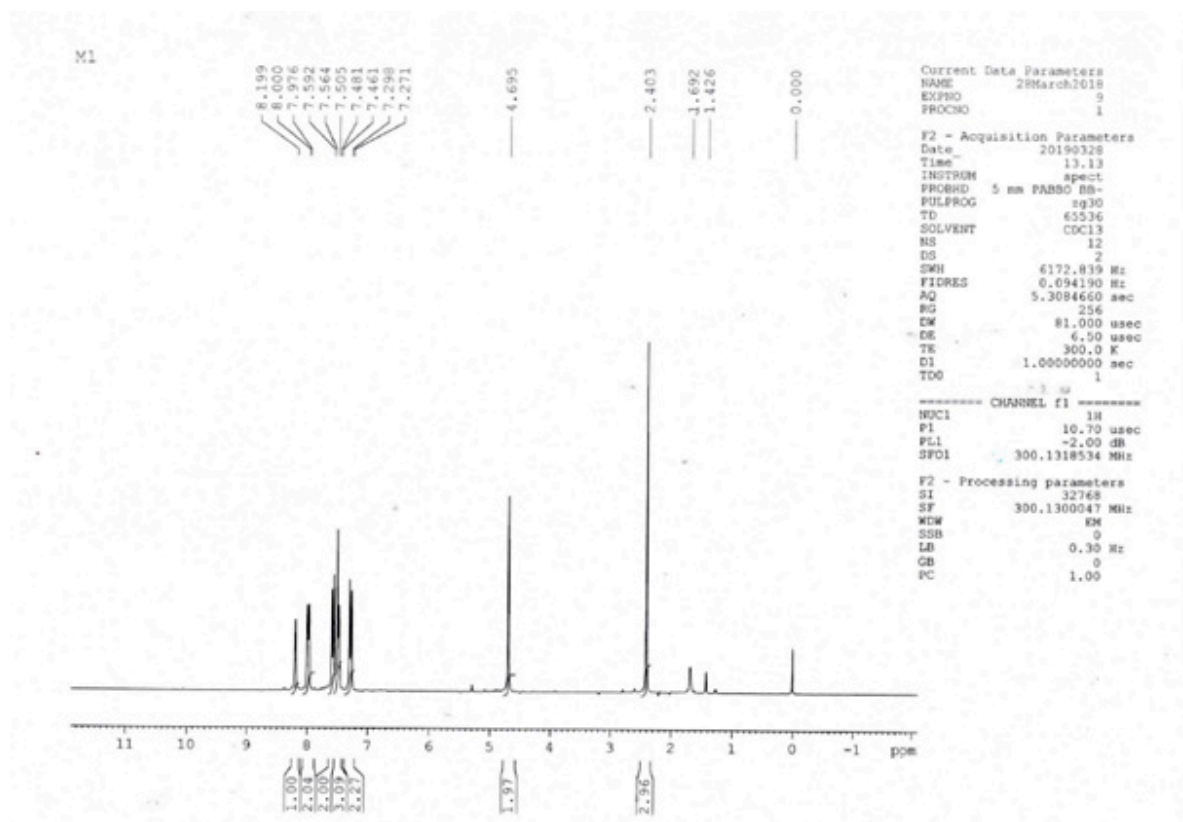

Figure S1:  $^1\text{H}$  NMR of compound 6

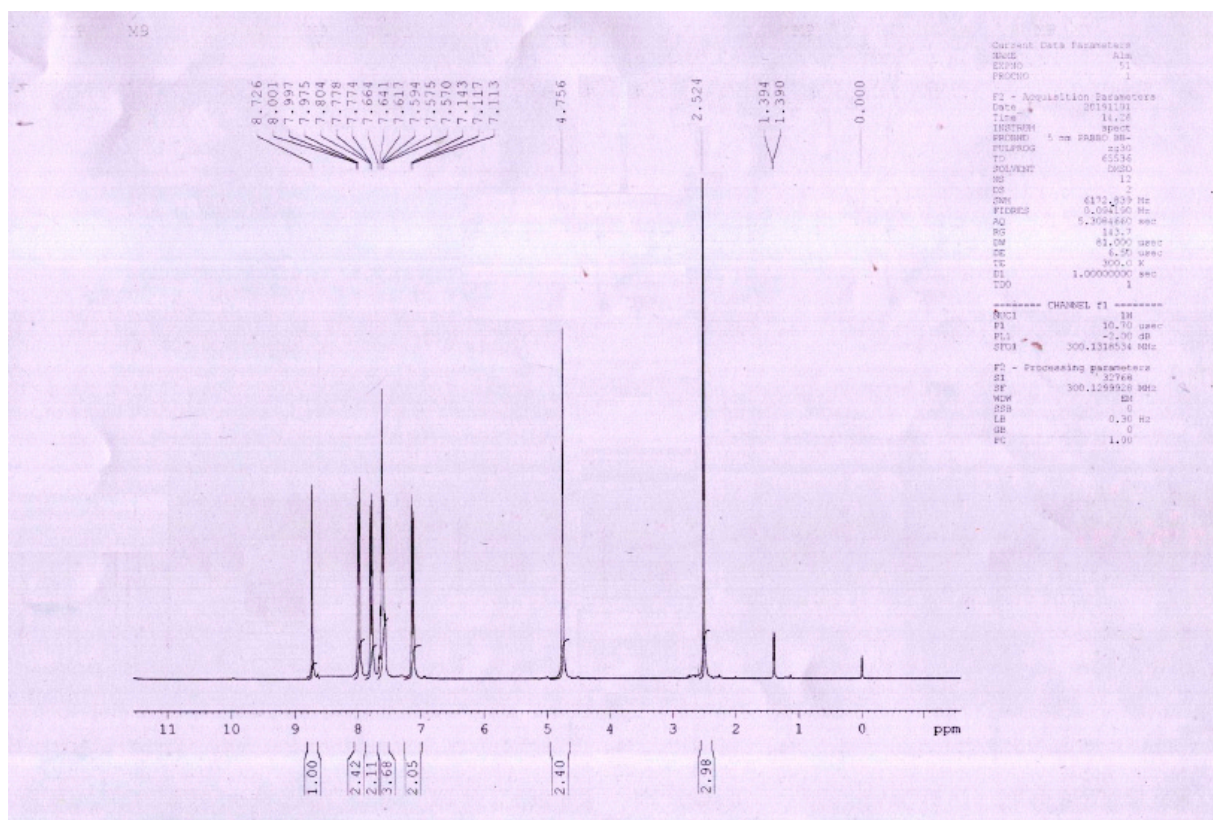

Figure S2: <sup>1</sup>H NMR of compound 7

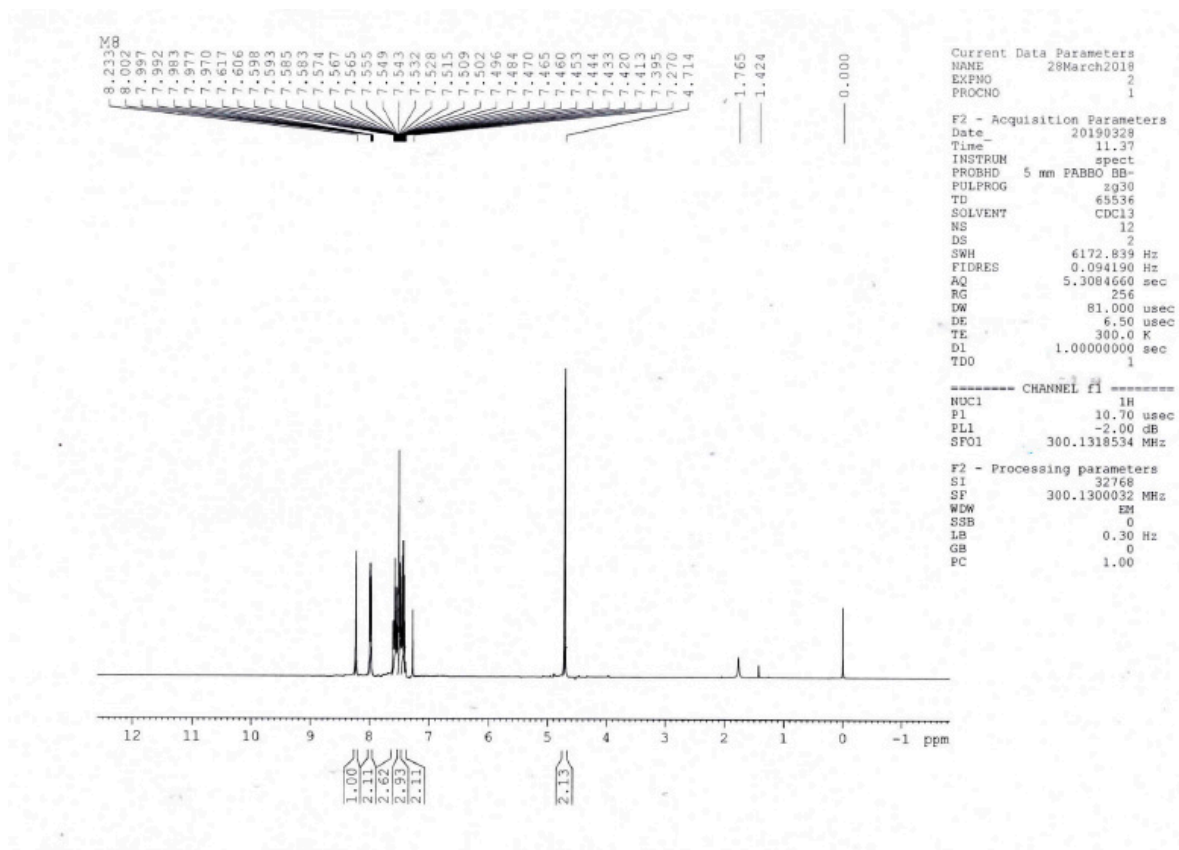

Figure S3:  $^1\text{H}$  NMR of compound 8

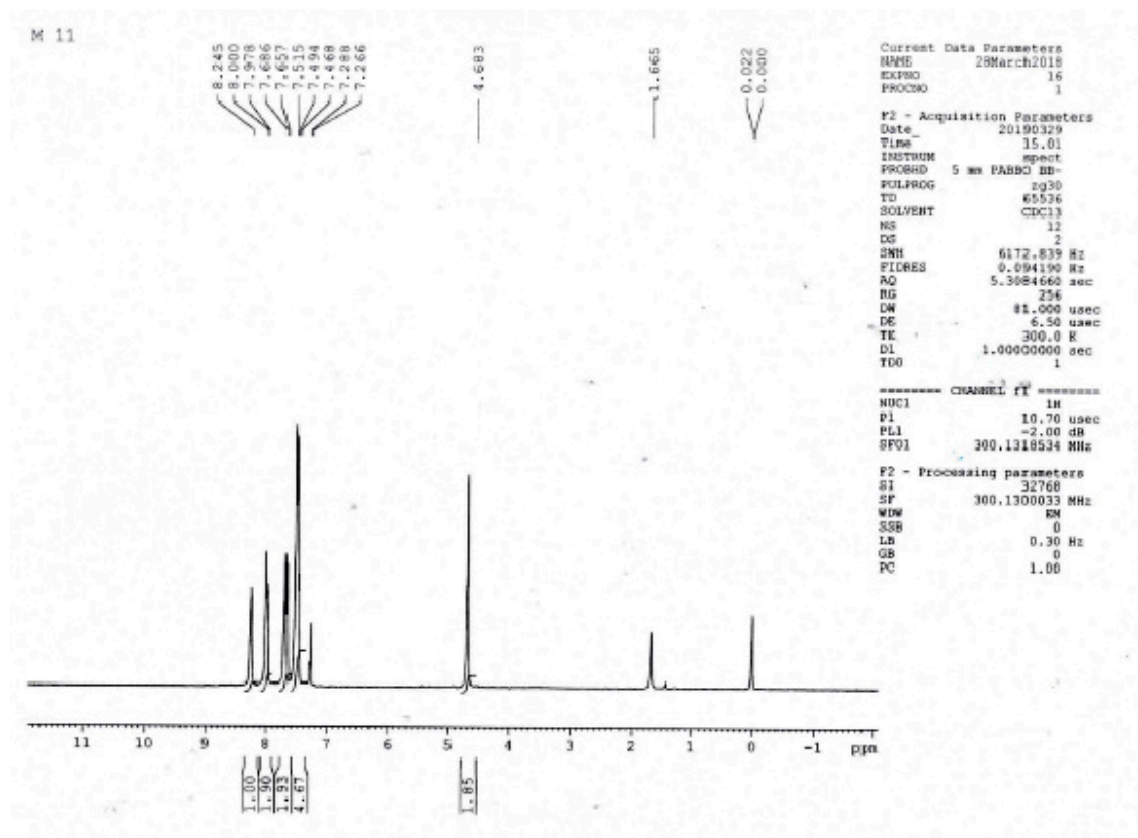

Figure S4:  $^1\text{H}$  NMR of compound 9

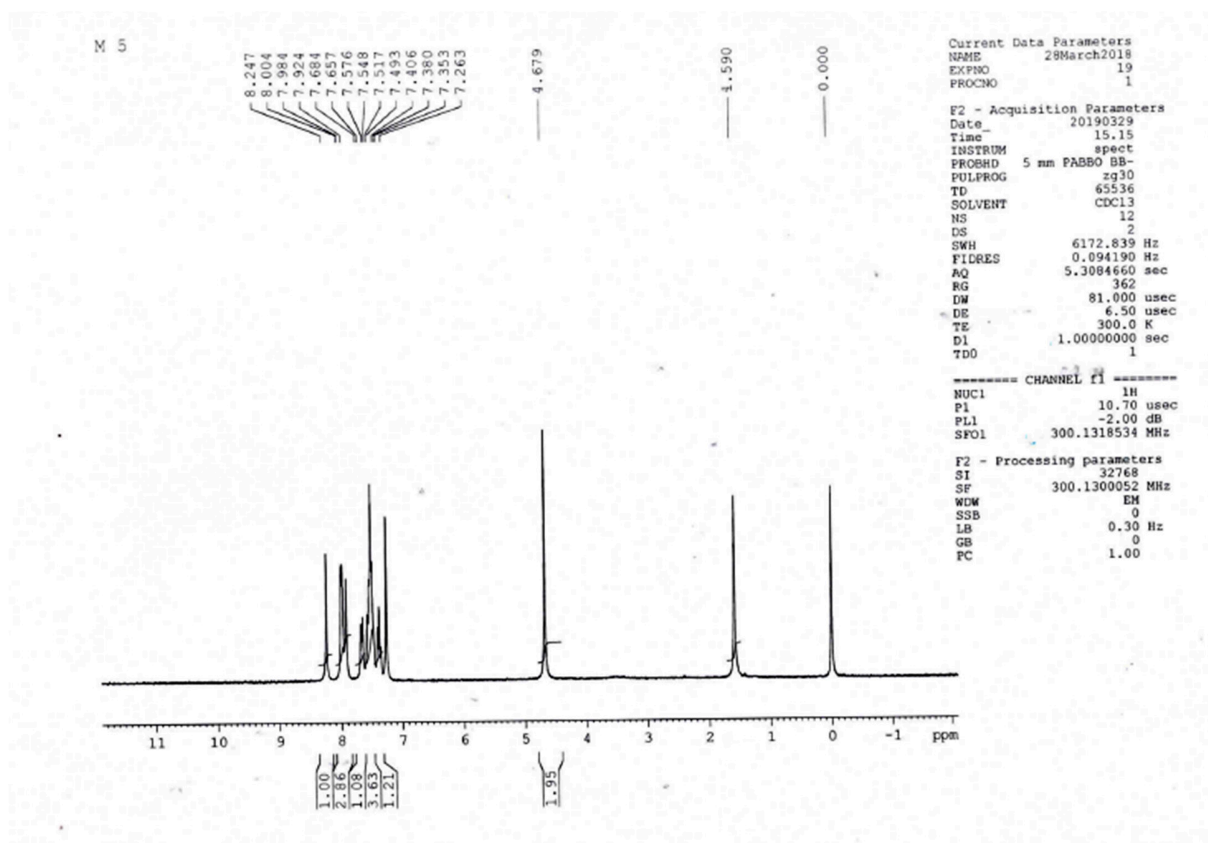

Figure S5: <sup>1</sup>H NMR of compound 10

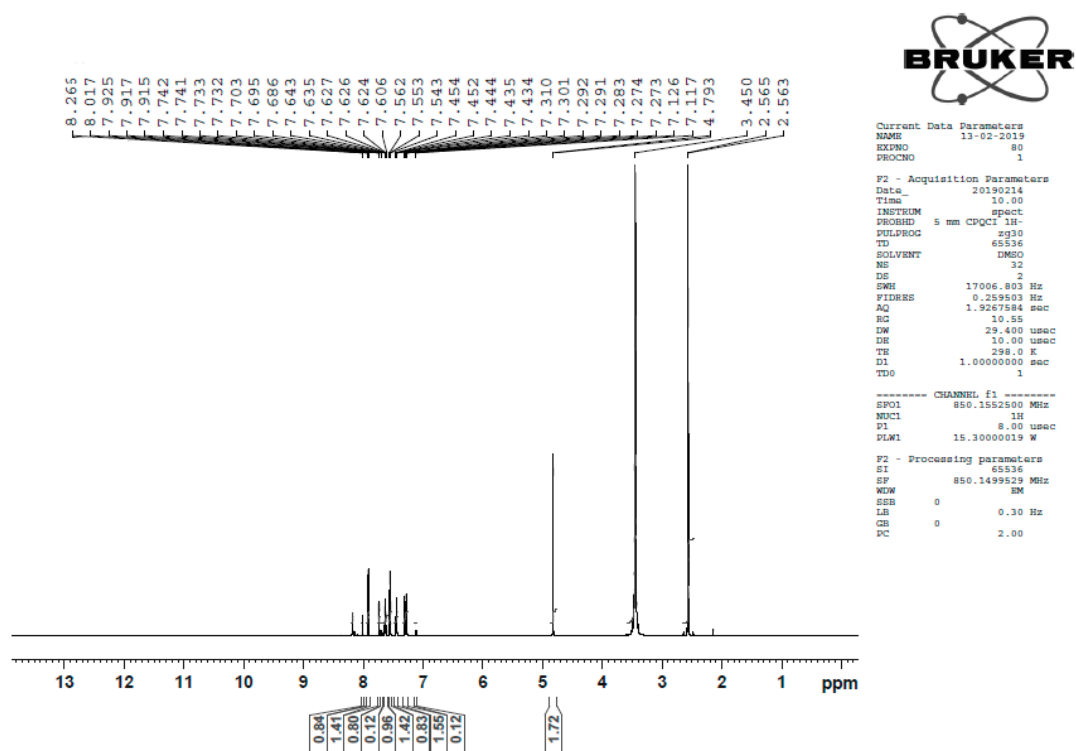

Figure S6: <sup>1</sup>H NMR of compound 11

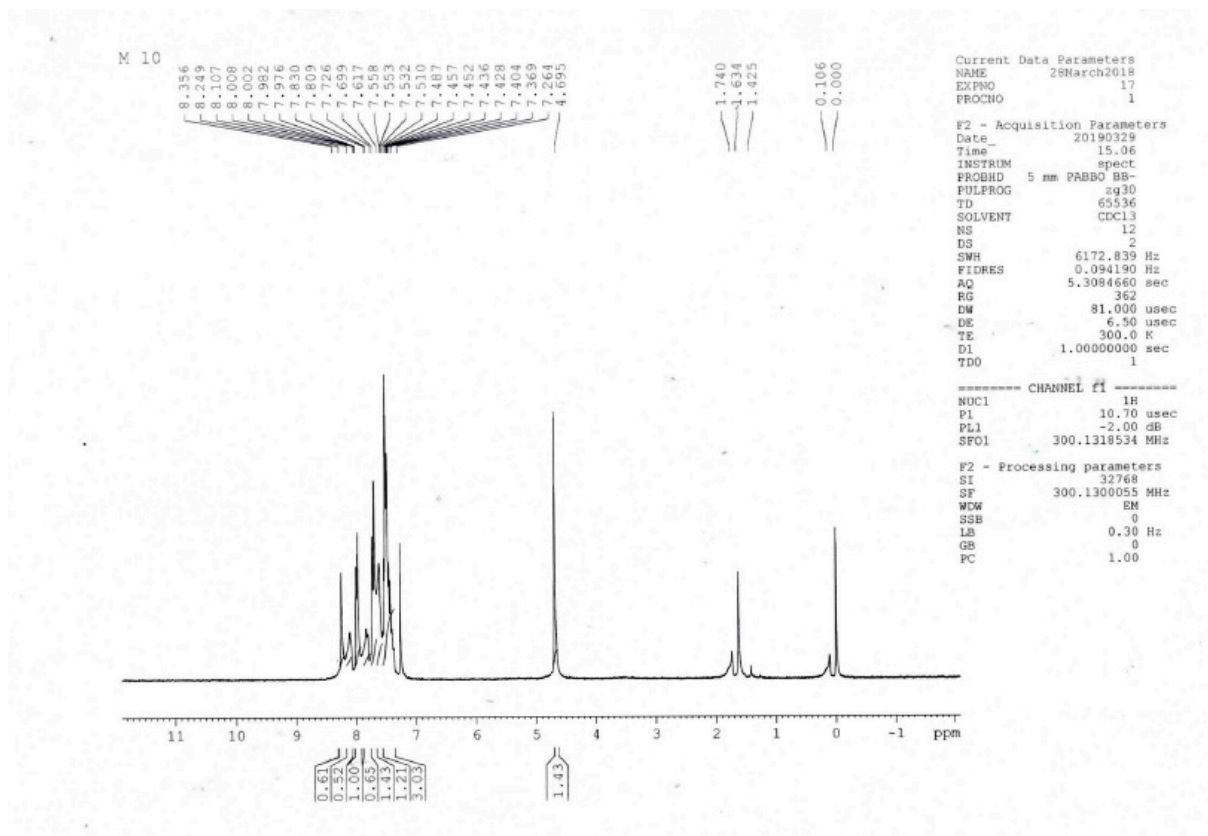

Figure S7:  $^1\text{H}$  NMR of compound 12



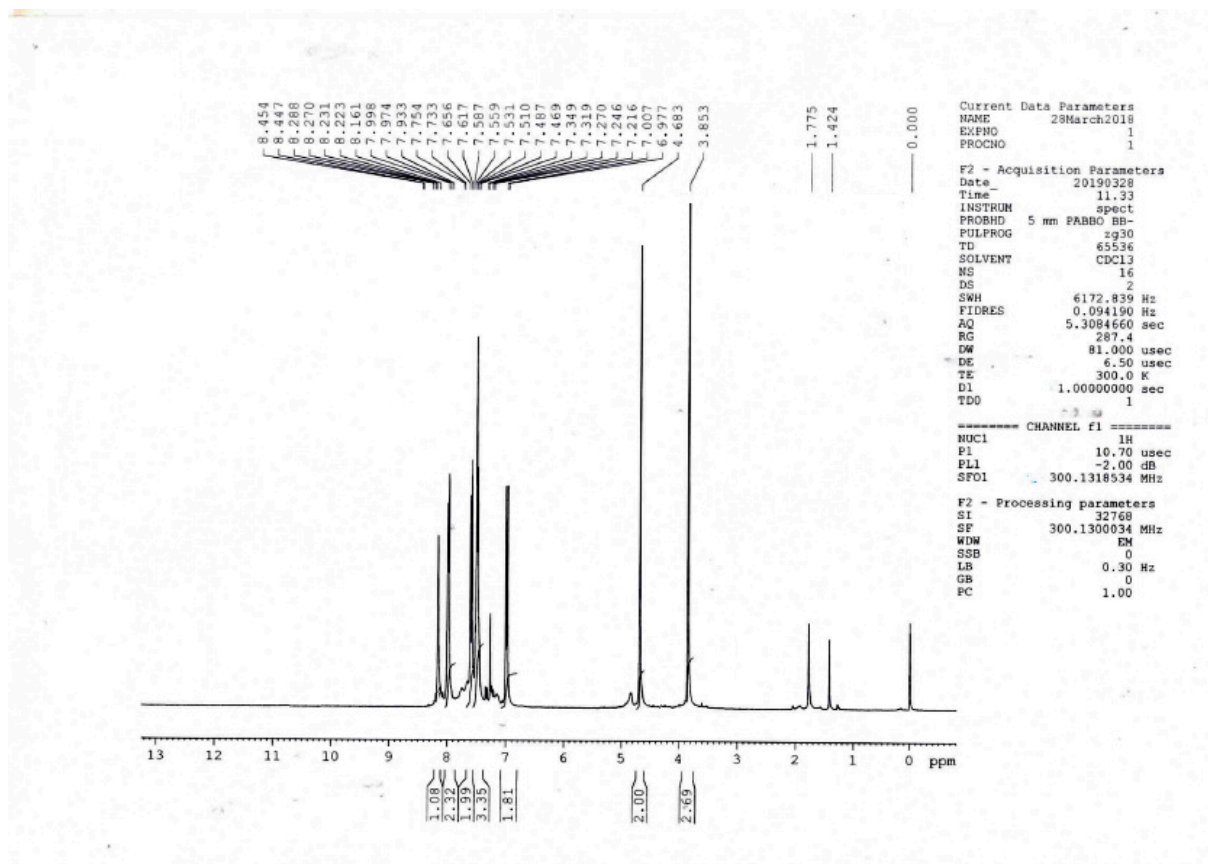

Figure S8:  $^1\text{H}$  NMR of compound 13

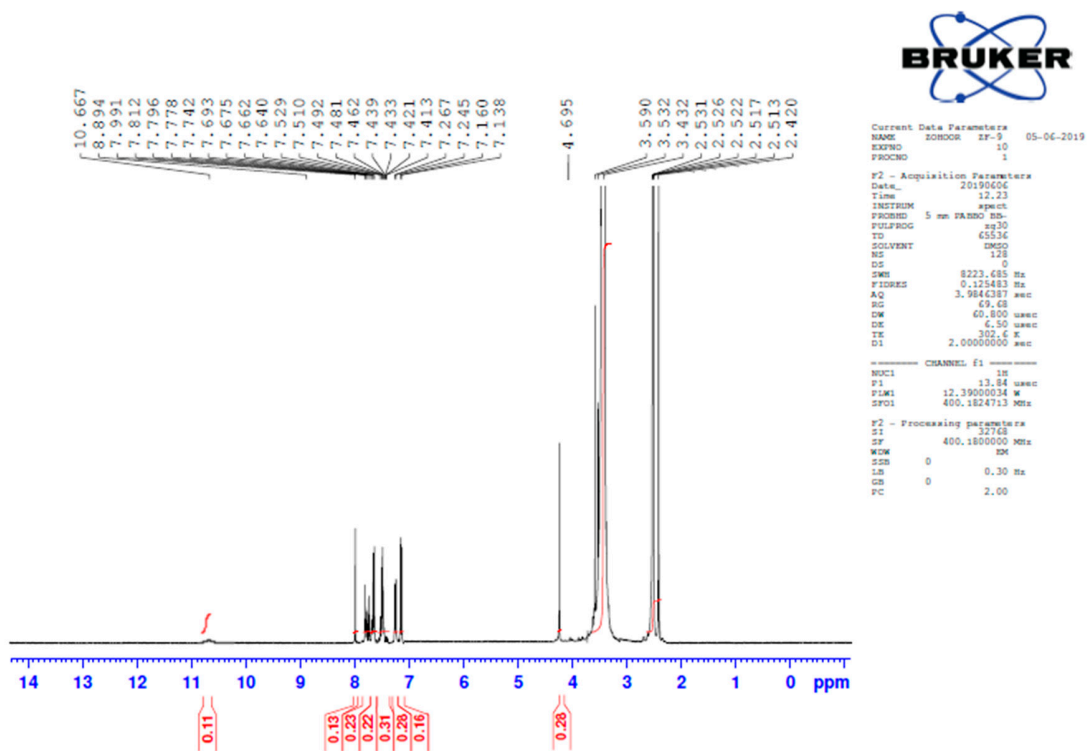

Figure S9: <sup>1</sup>H NMR of compound 14

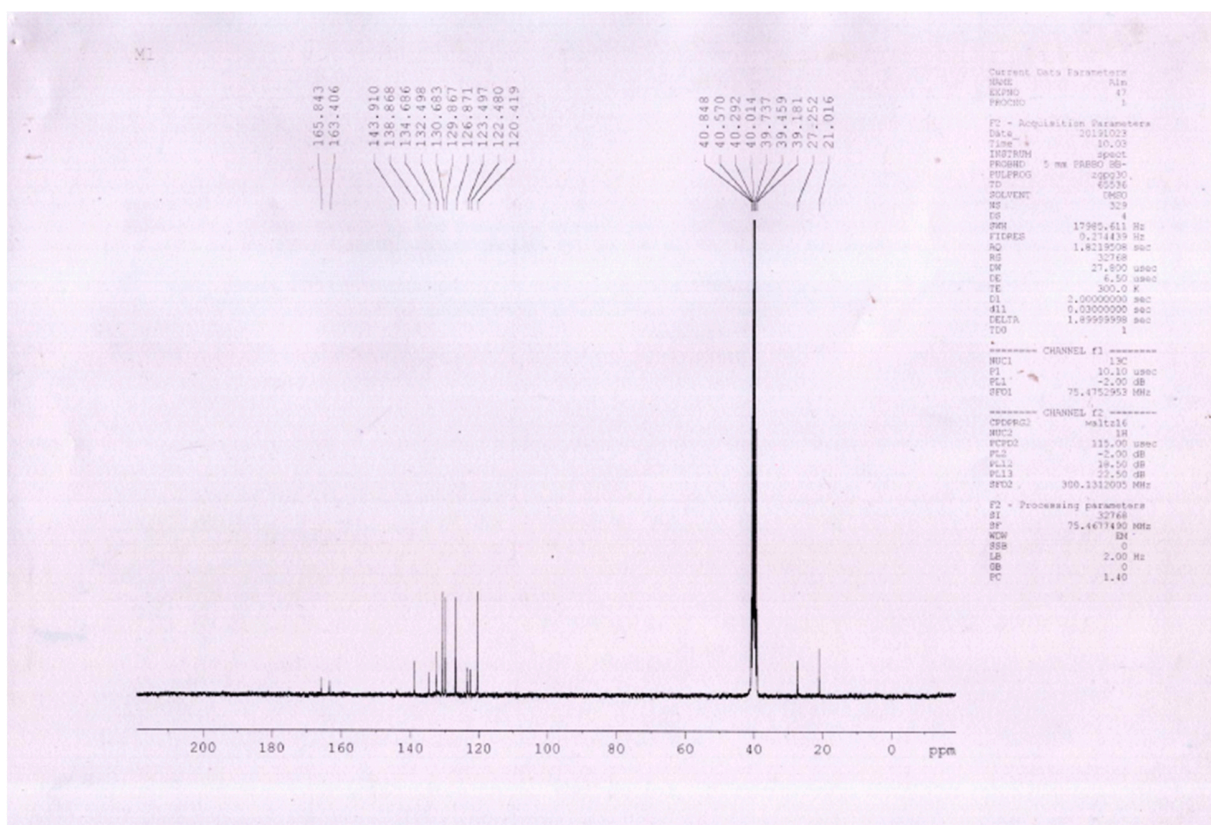

Figure S10:  $^{13}\text{C}$  NMR of compound 6

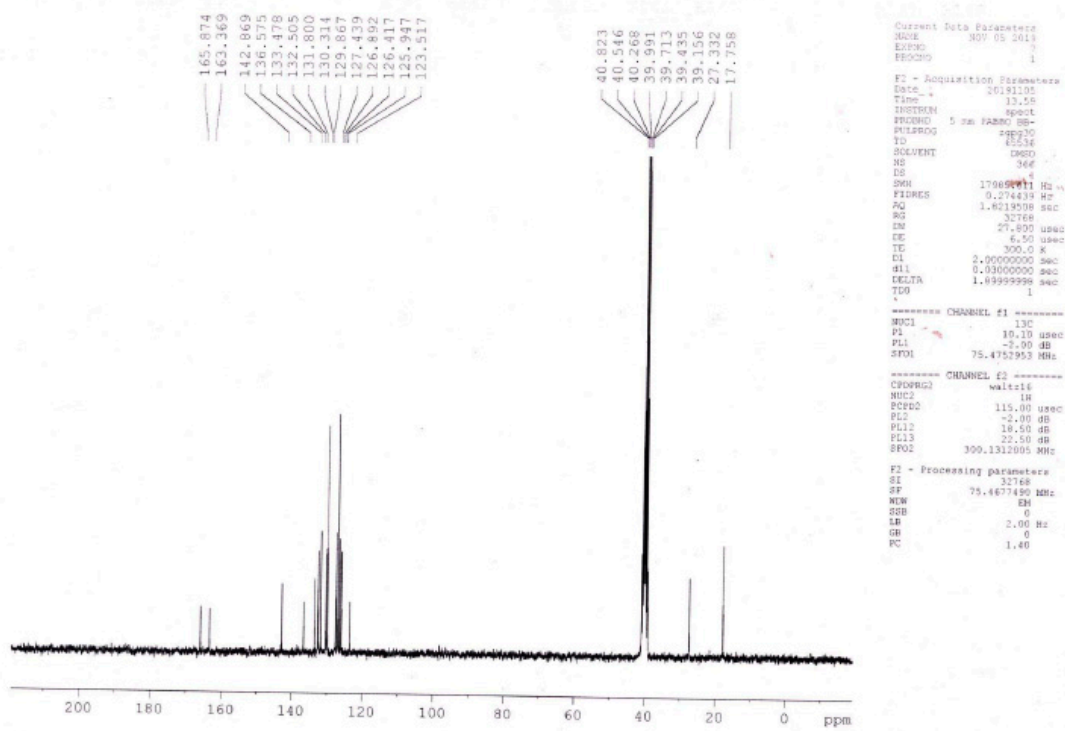

Figure S11: <sup>13</sup>C NMR of compound 7

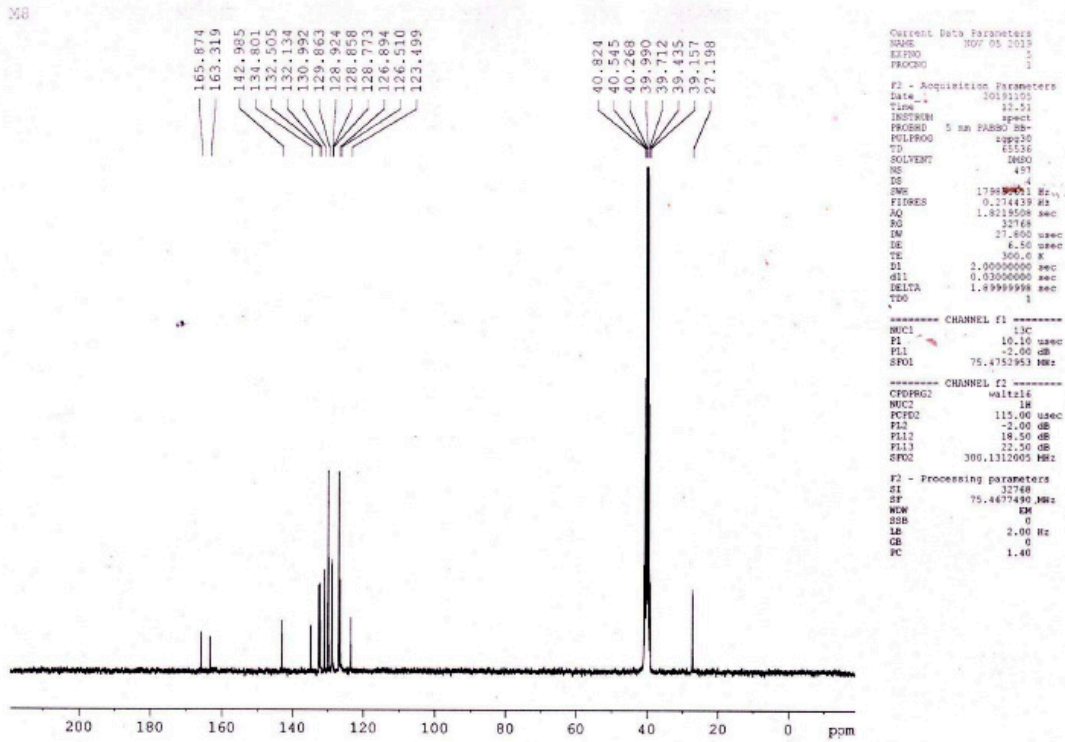

Figure S12: <sup>13</sup>C NMR of compound 8

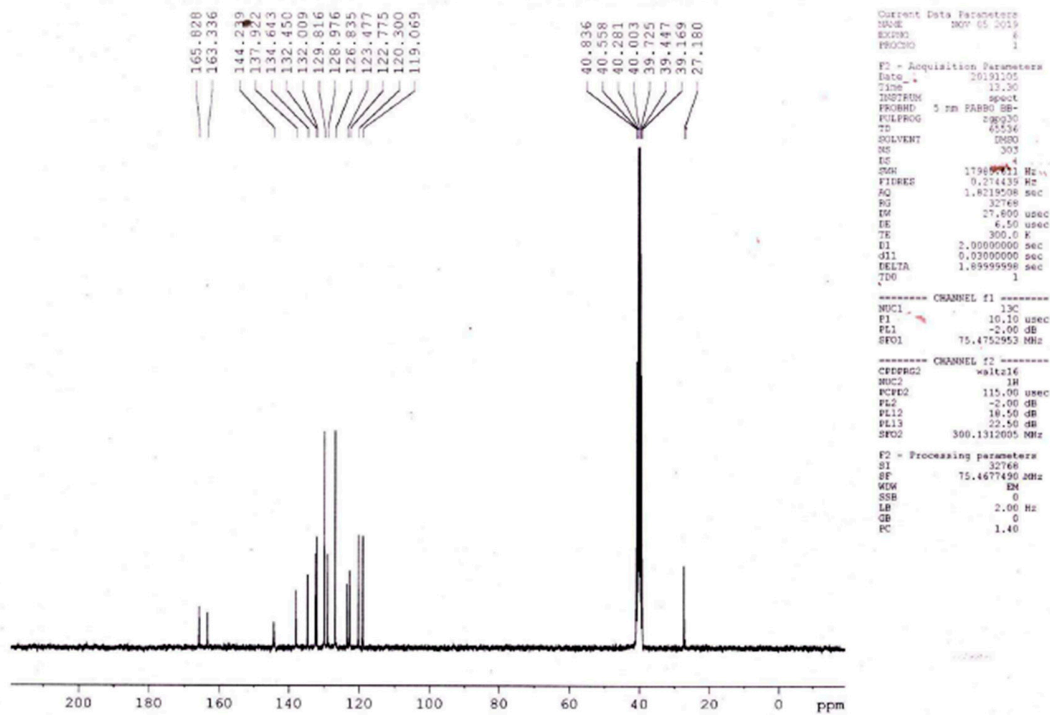

Figure S13:  $^{13}\text{C}$  NMR of compound 9

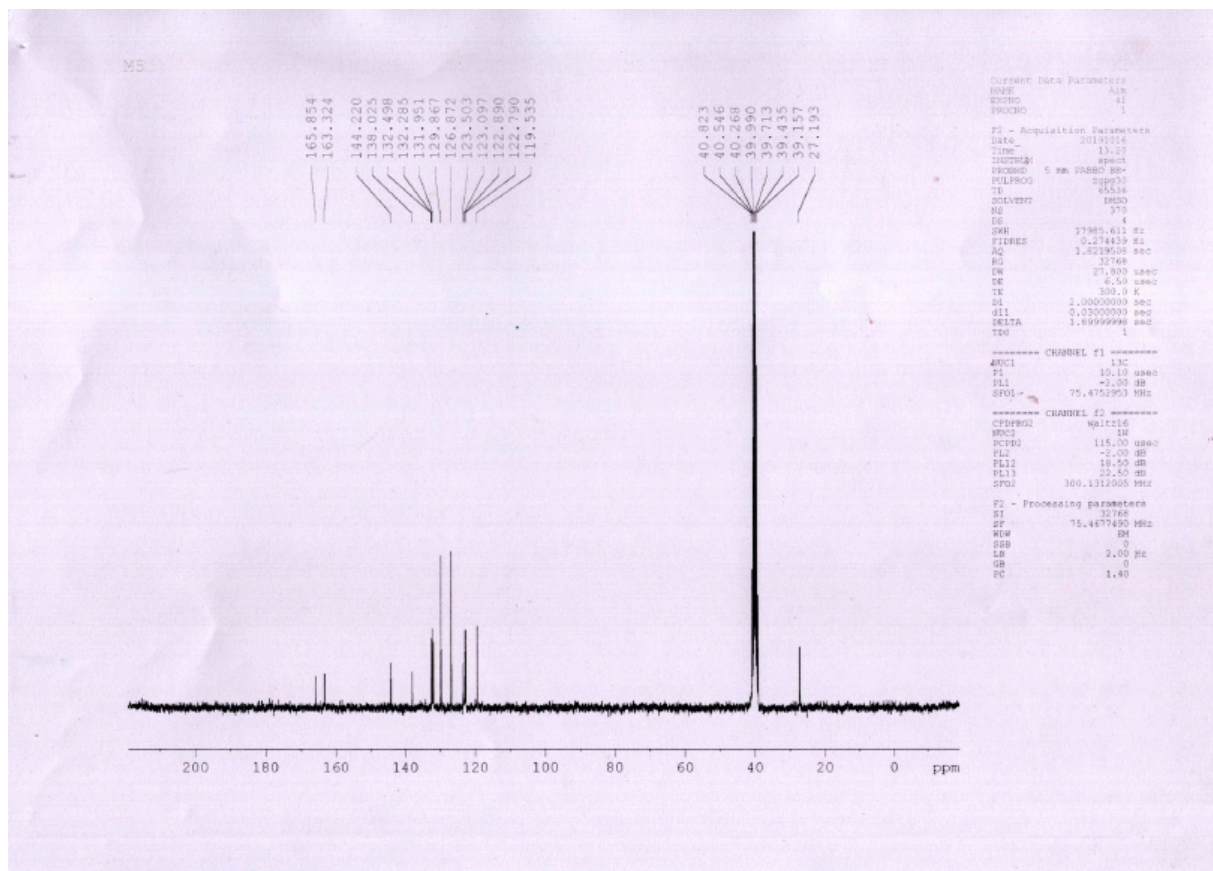

Figure S14:  $^{13}\text{C}$  NMR of compound 10

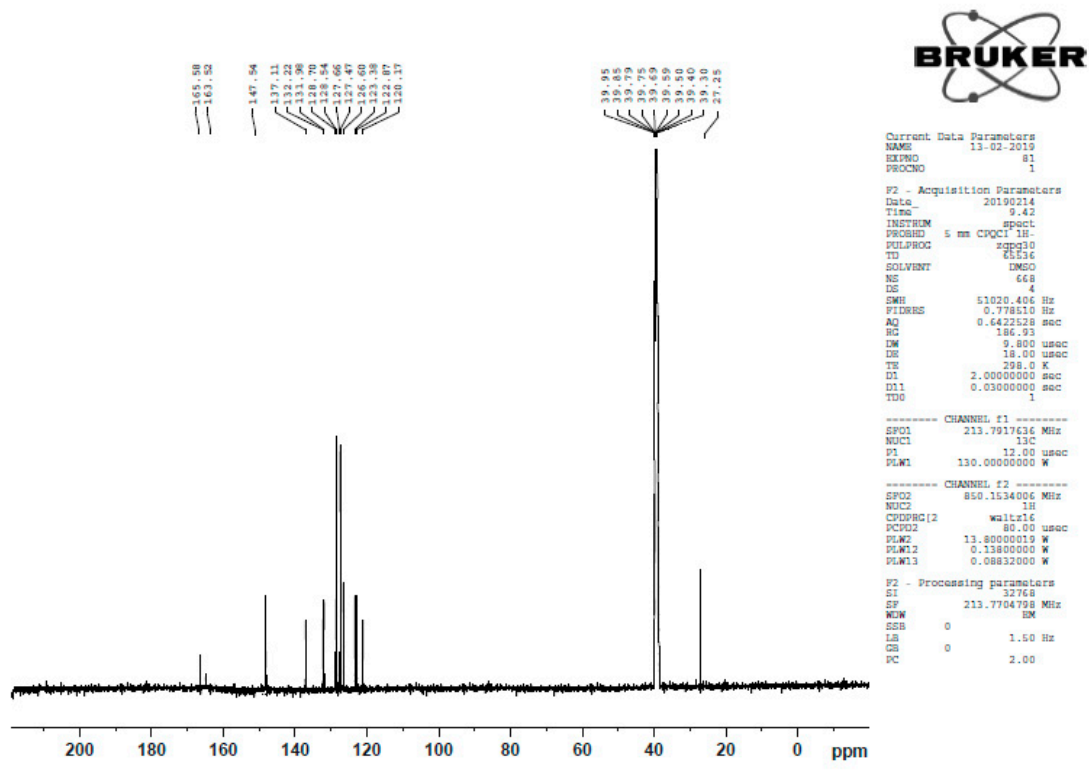

Figure S15: <sup>13</sup>C NMR of compound 11



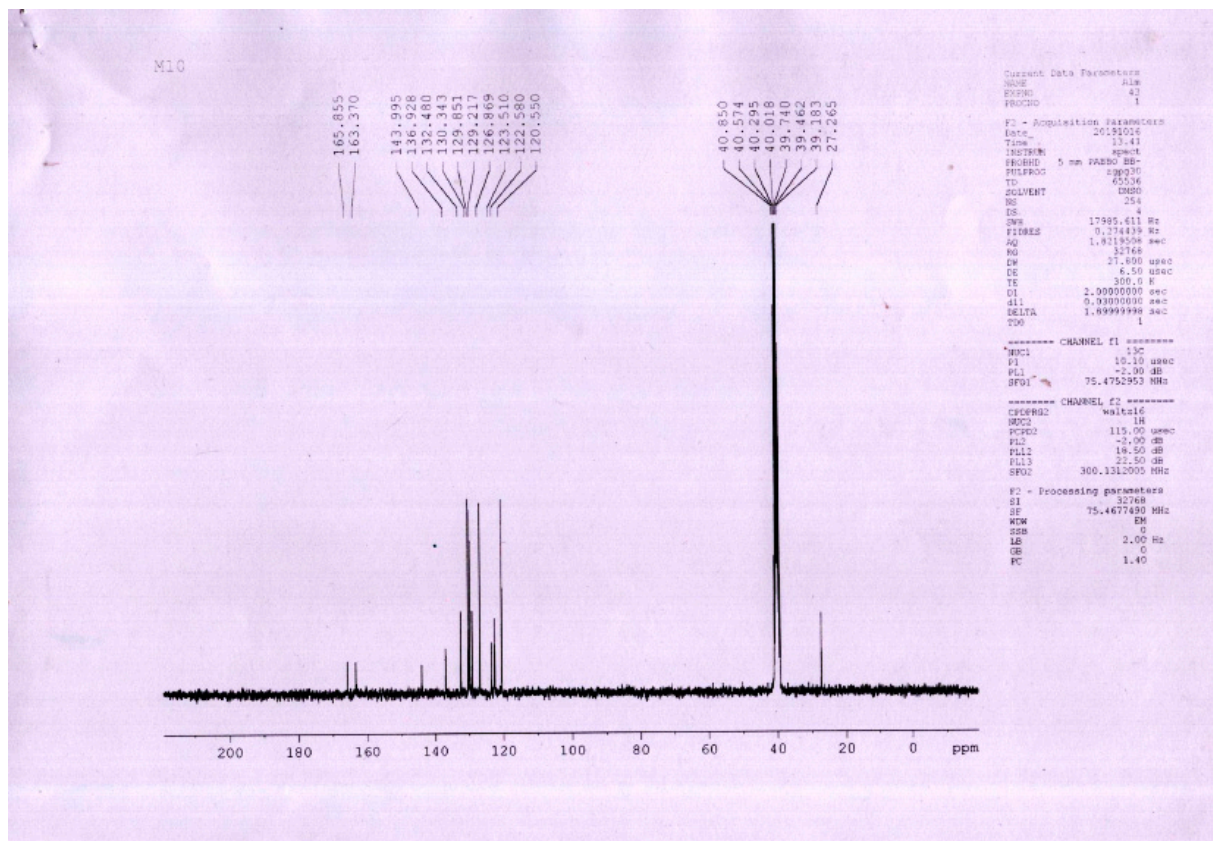

Figure S16:  $^{13}\text{C}$  NMR of compound 12

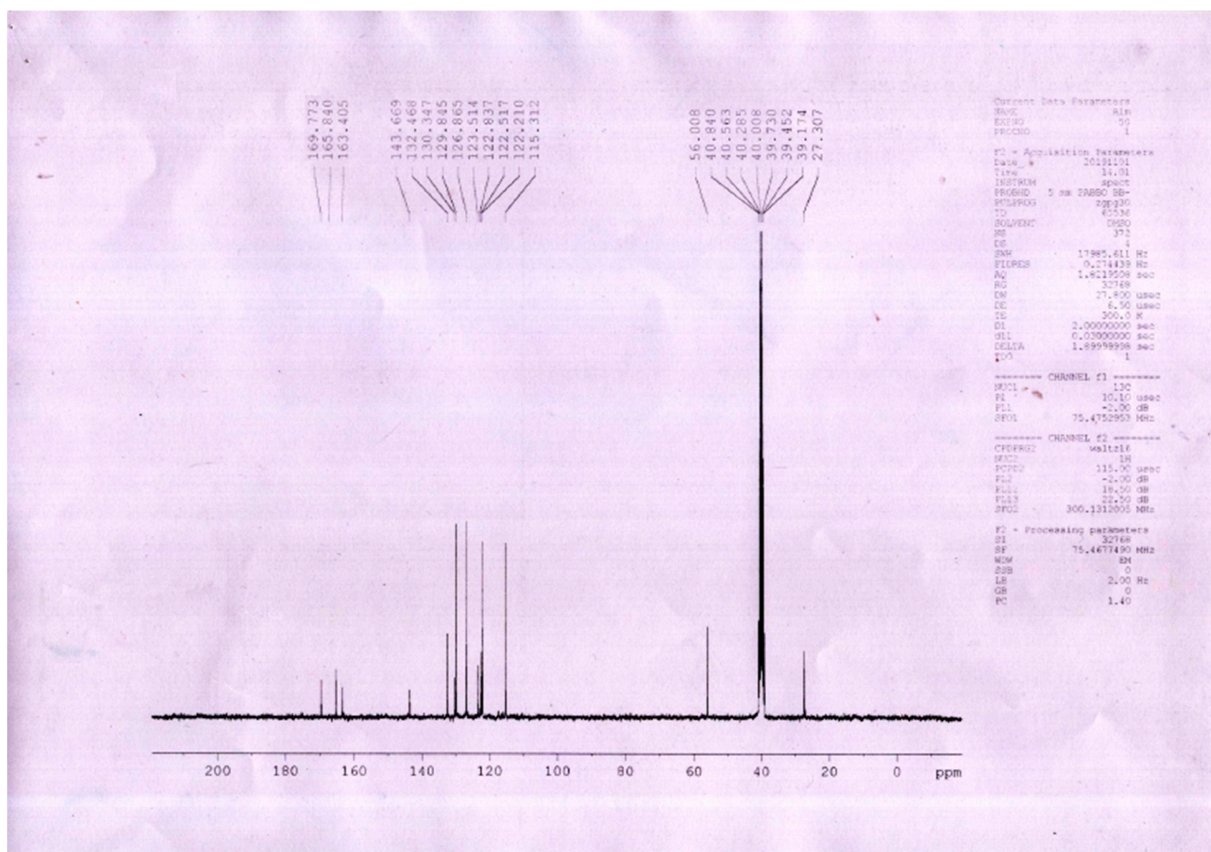

Figure S17: <sup>13</sup>C NMR of compound 13

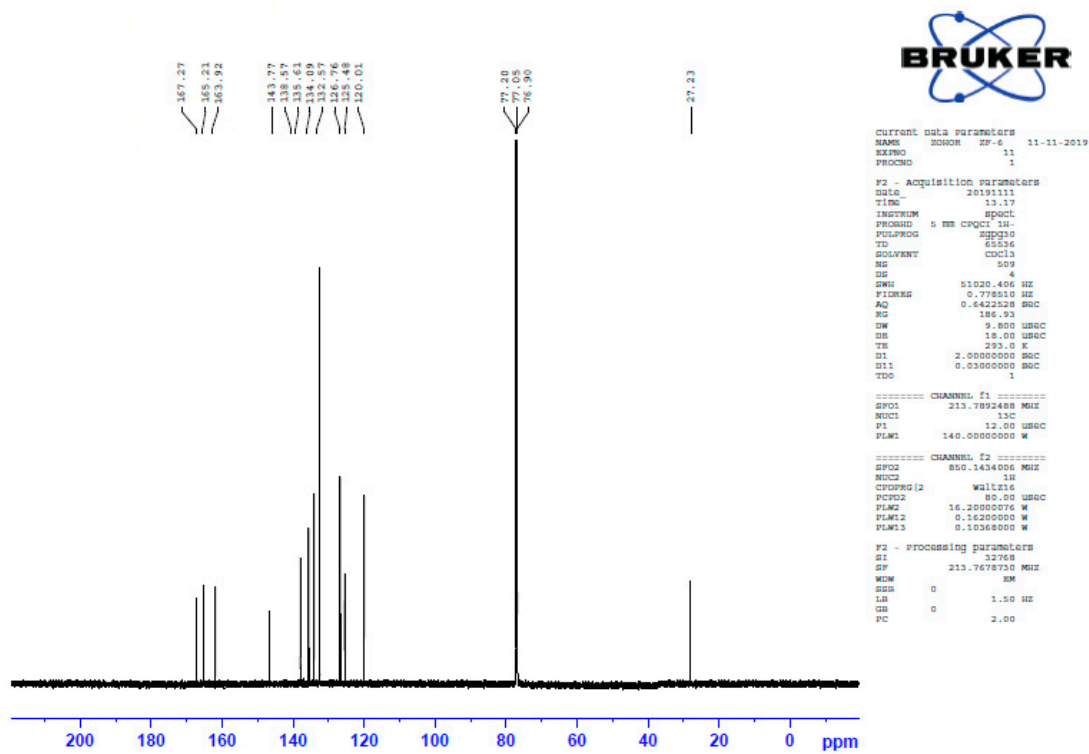

Figure S18: <sup>13</sup>C NMR of compound 14

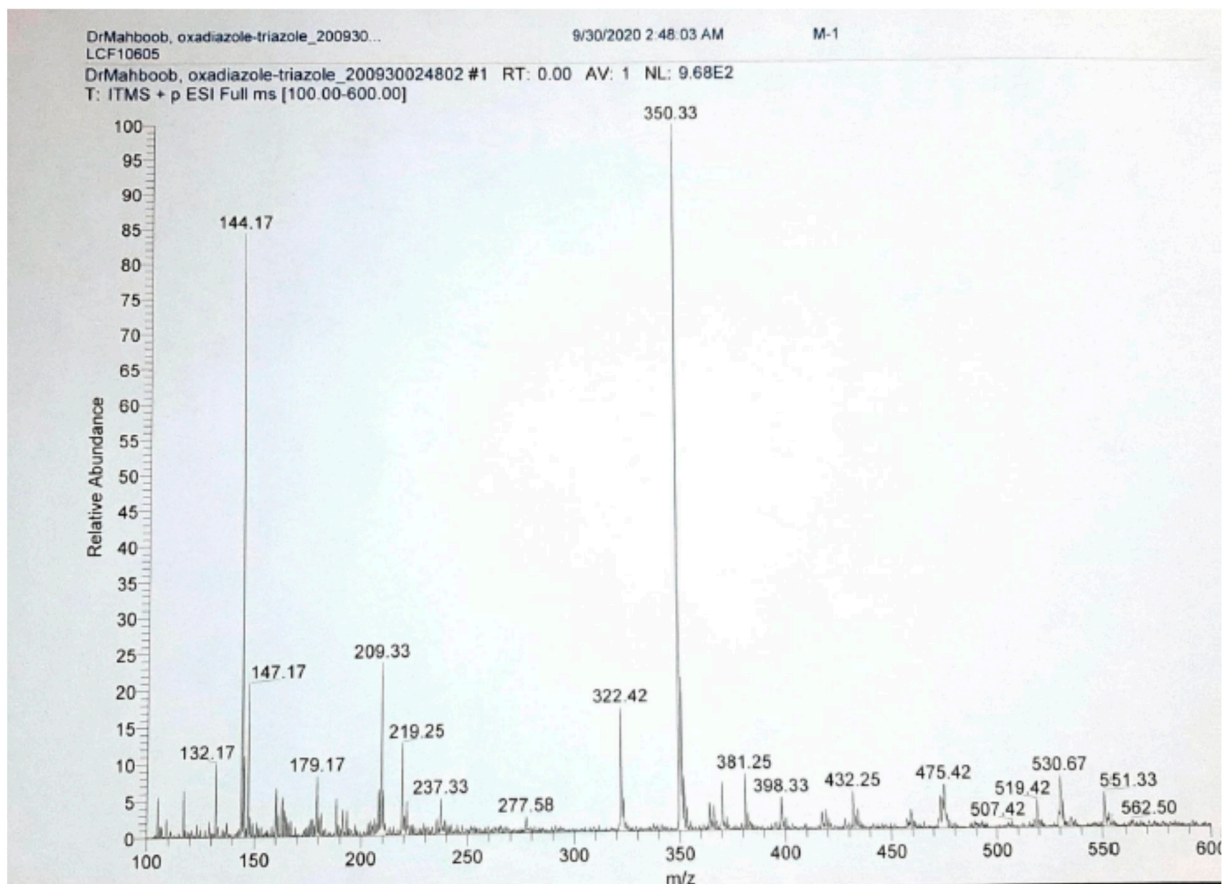

Figure S19: Mass of compound 6

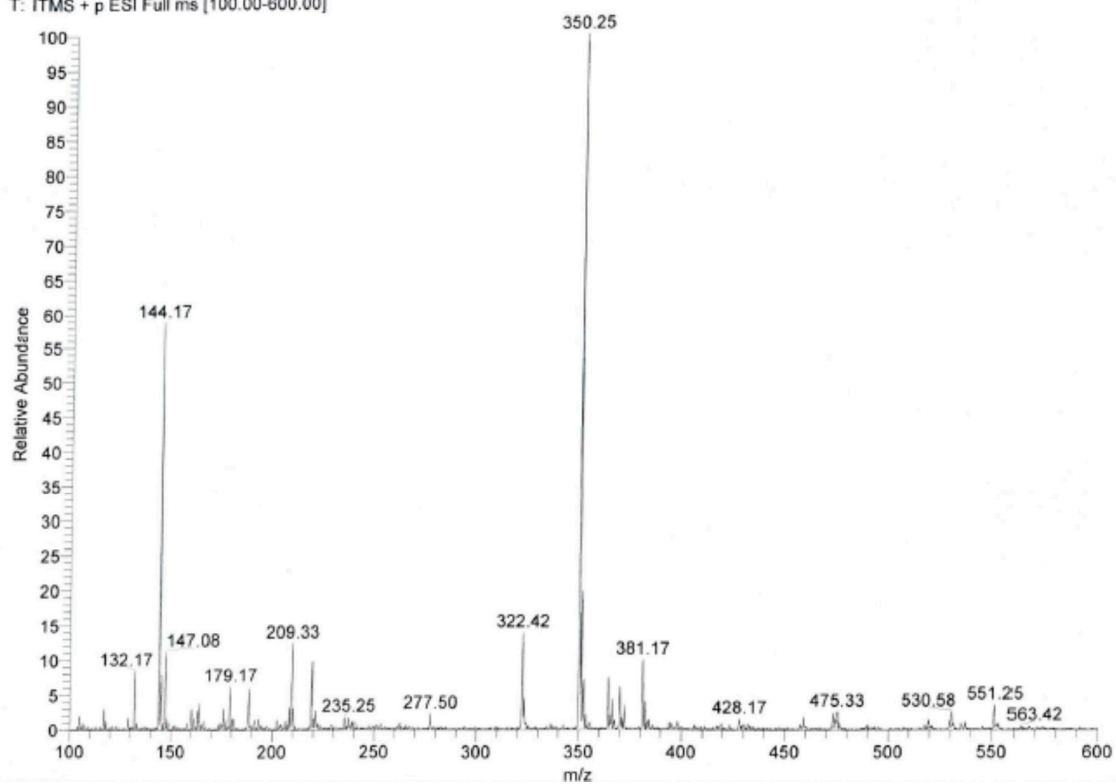

Figure S20: Mass of compound 7

DrMahboob\_200930022940 #1 RT: 0.00 AV: 1 NL: 8.61E3  
T: ITMS + p ESI Full ms [100.00-600.00]

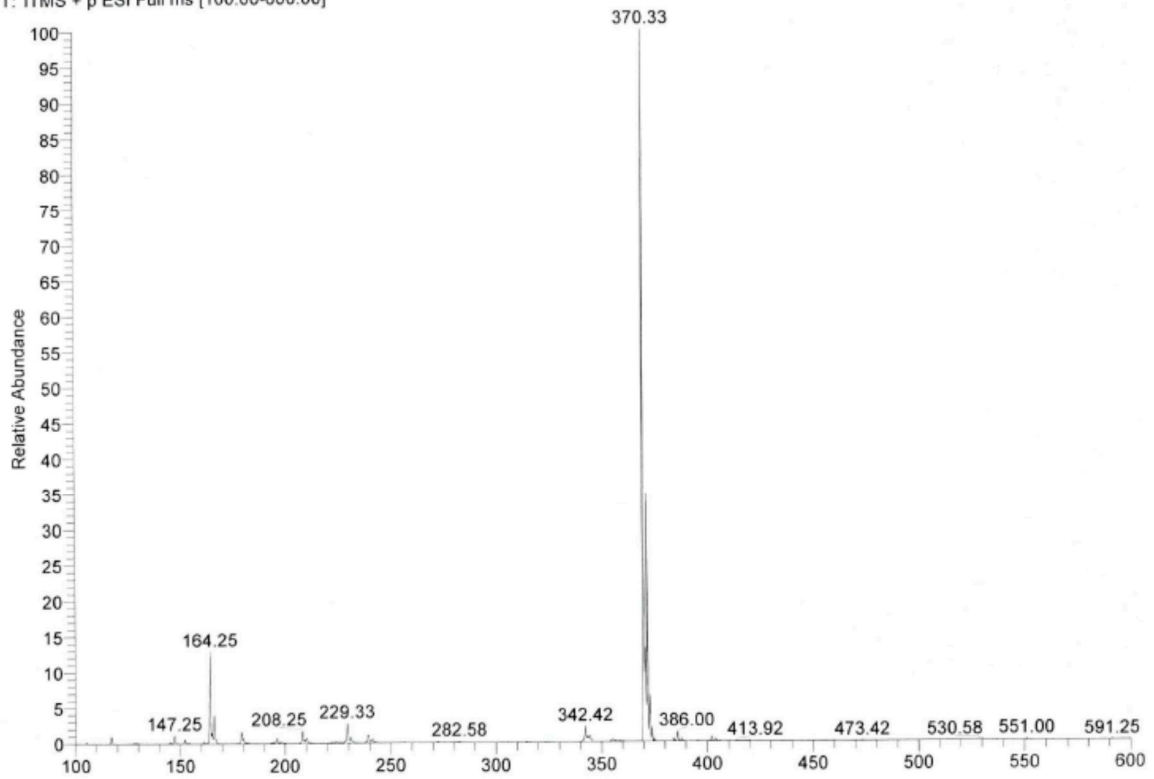

Figure S21: Mass of compound 8

DrMahboob, oxadiazole-triazole\_200930...  
LCF10605

9/30/2020 2:31:47 AM

M-11

DrMahboob, oxadiazole-triazole\_200930022940 #1 RT: 0.00 AV: 1 NL: 1.33E3  
T: ITMS + p ESI Full ms [100.00-600.00]

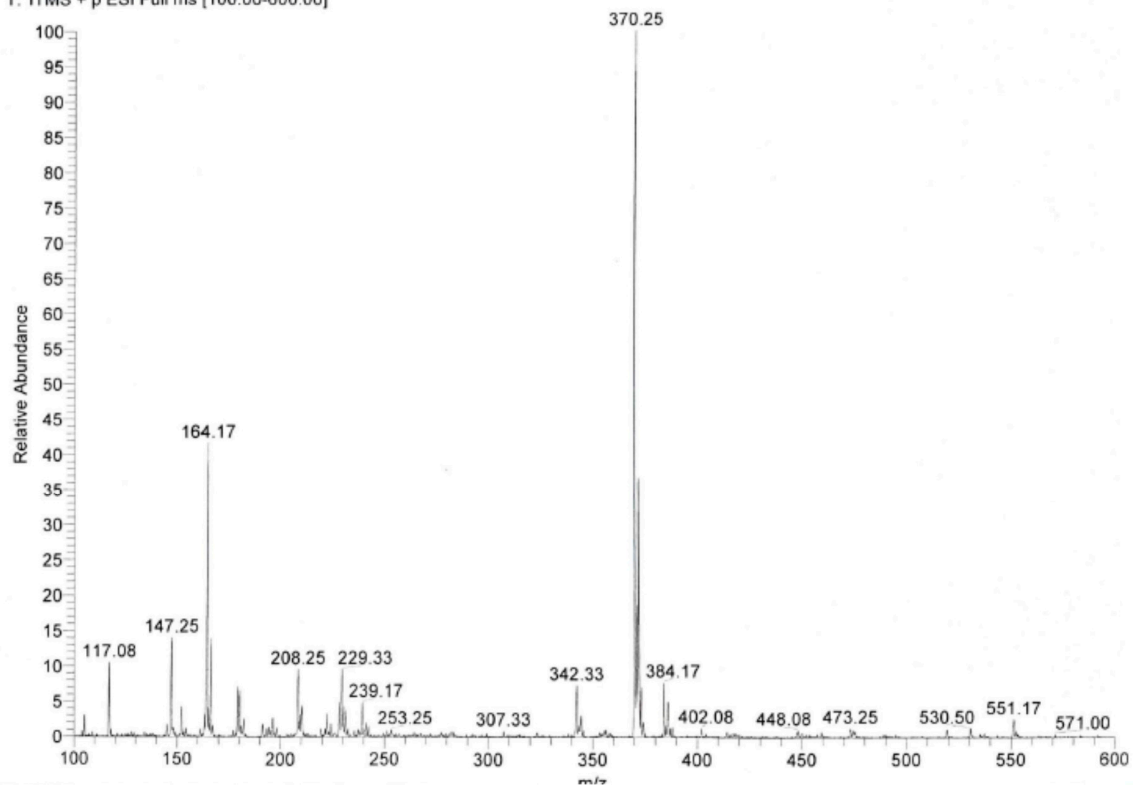

Figure S22: Mass of compound 9

DrMahboob, oxadiazole-triazole\_200930...  
LCF10605

9/30/2020 3:32:33 AM

M-5

DrMahboob, oxadiazole-triazole\_200930033232 #1 RT: 0.00 AV: 1 NL: 6.36E3  
T: ITMS + p ESI Full ms [100.00-600.00]

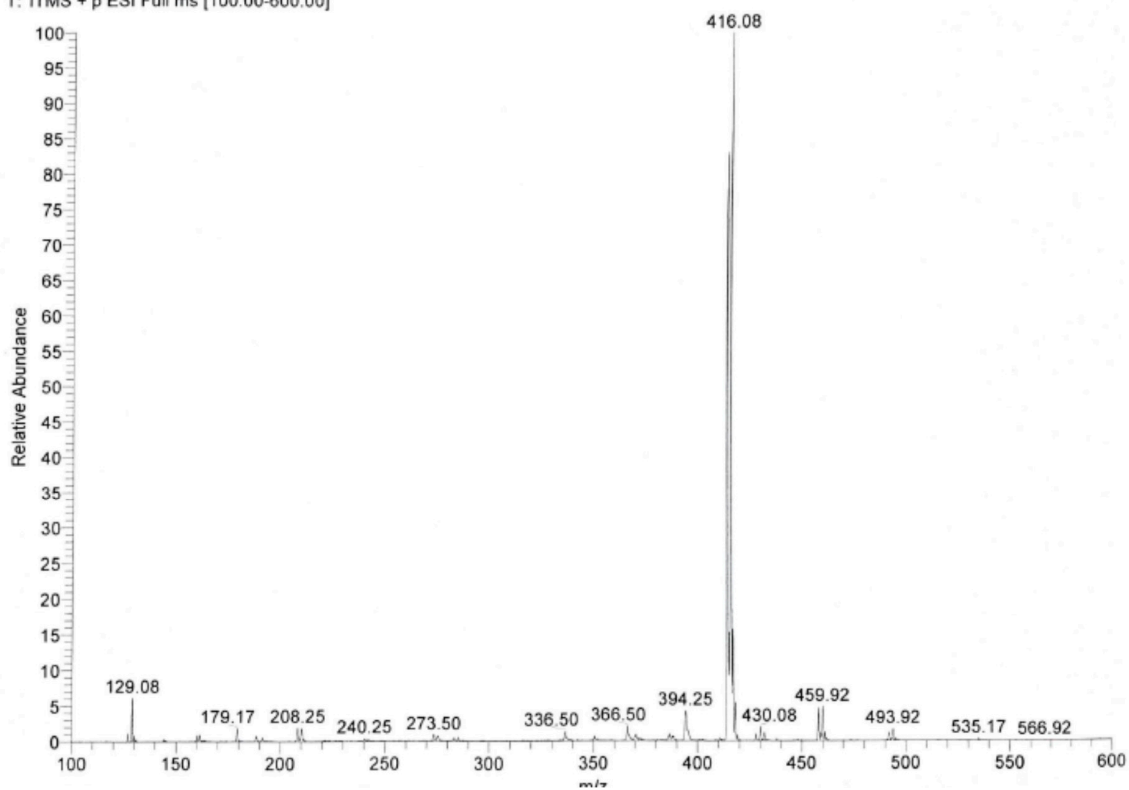

Figure S23: Mass of compound 10



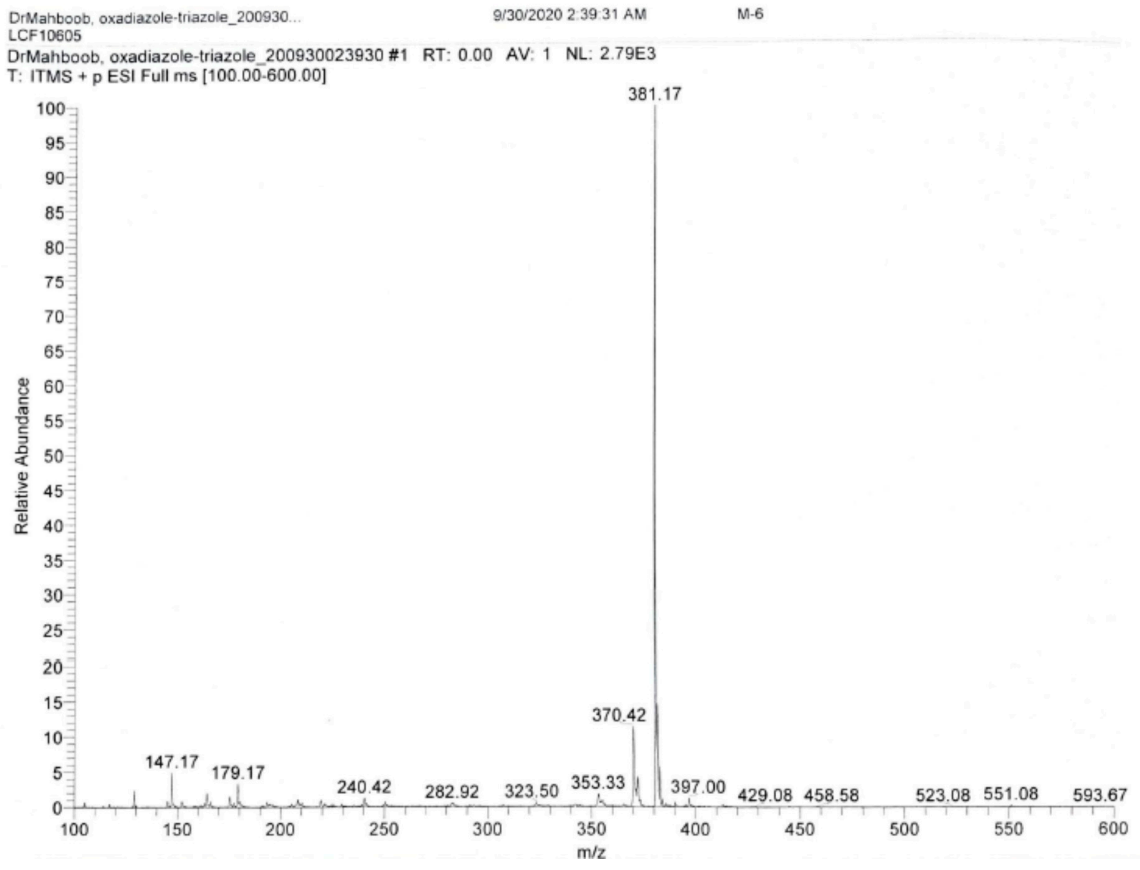

Figure S24: Mass of compound 11

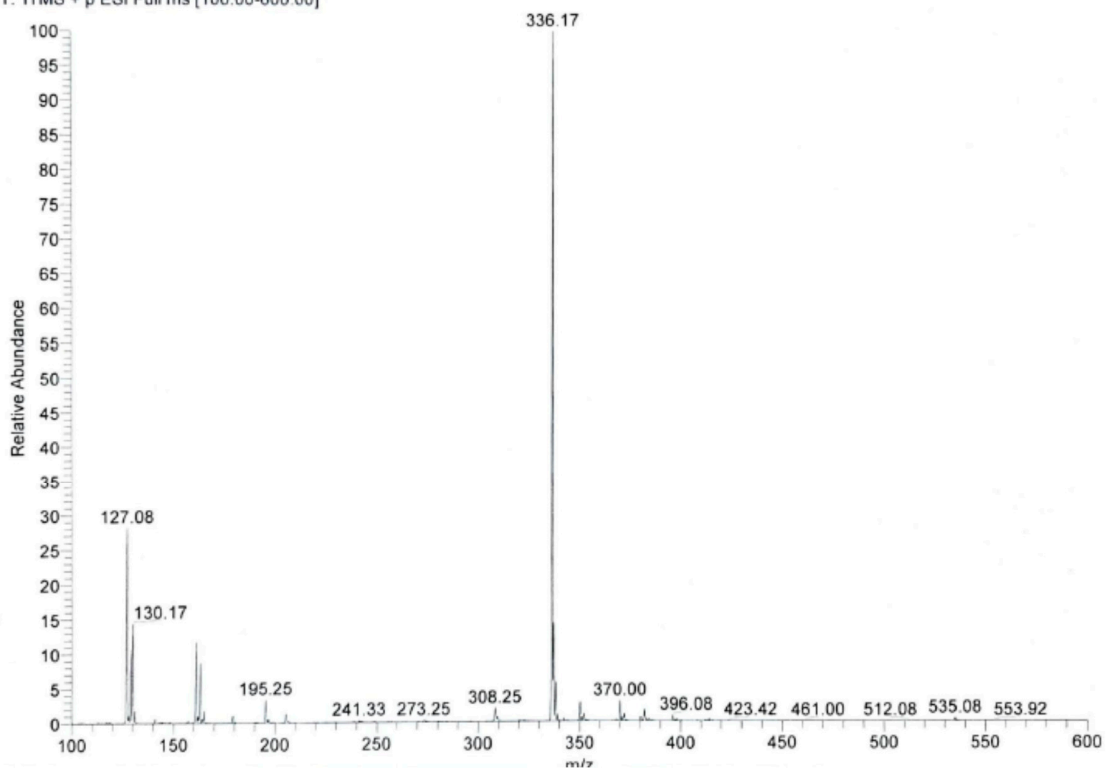

Figure S25: Mass of compound 12

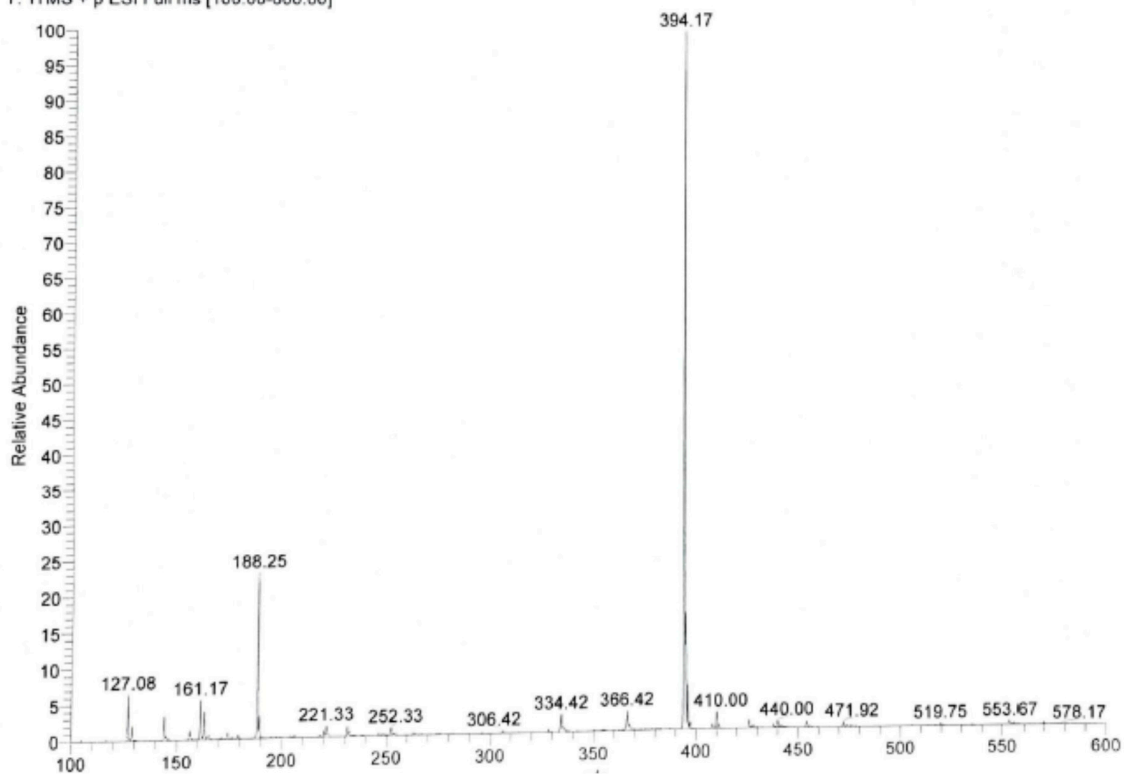

Figure S26: Mass of compound 13

C:\Thermo\ \_200922051538  
LCF10605  
\_200922051538 #1 RT: 0.00 AV: 1 NL: 3.84E2  
T: ITMS + p ESI Full ms [150.00-700.00]

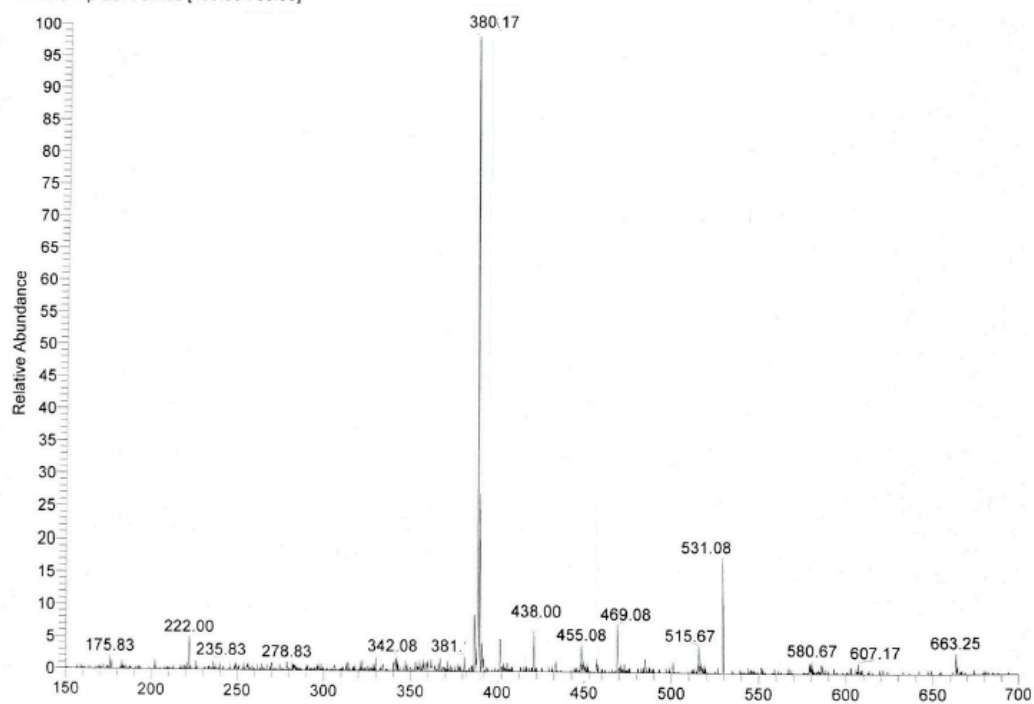

Figure S27: Mass of compound 14
